# Supplementary material for: Deposition of Au nanoparticles inside porous CeO2 nanocubes using Langmuir–Blodgett technique
Source: Royal Society of Chemistry journal article supplement (doi:10.1039/c7nj03948d), 2017-12-12
Supplement: c7nj03948d1.pdf [file c7nj03948d1.pdf]

## Deposition of Au nanoparticles inside porous CeO<sub>2</sub> nanocubes using Langmuir Blodgett Technique

Subhasis Das,<sup>a</sup> Gourab Bhattacharjee,<sup>b</sup> Biswarup Satpati,<sup>b</sup> Mukesh Kumar,<sup>c</sup> Sasanka Deka,<sup>c</sup> Manoj Kumar Ghosal,<sup>d</sup> Chinnakonda S. Gopinath<sup>d</sup> and Tanushree Bala<sup>\*a</sup>

### Supporting information SI-1

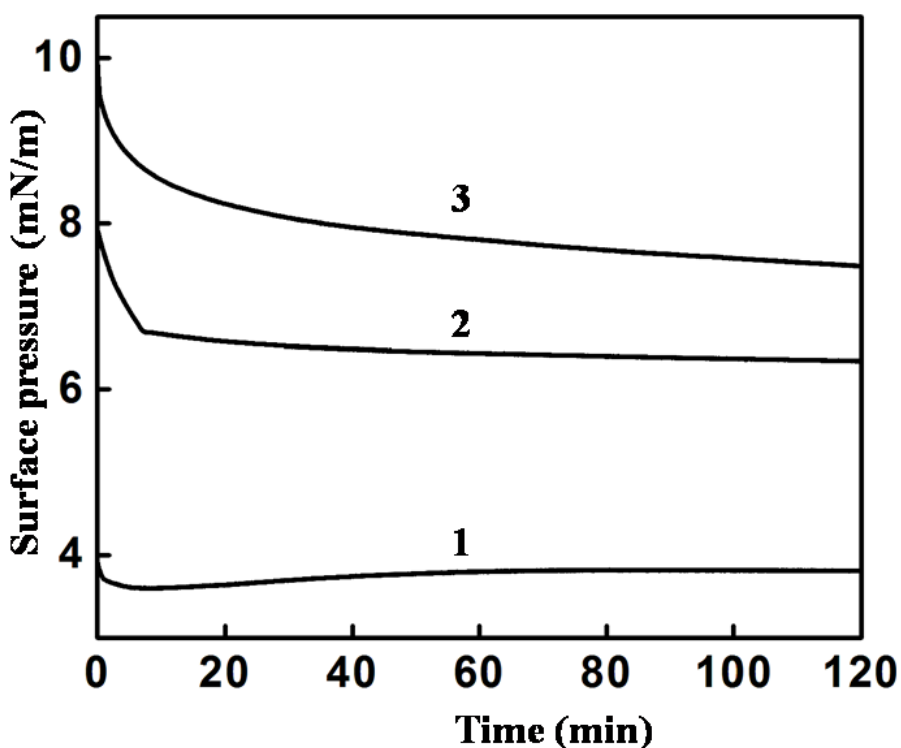

**Figure SI-1:** Surface pressure versus time plots of CeO<sub>2</sub> nanocubes over water subphase at surface pressures of 4 mN/m (curve 1), 8 mN/m (curve 2) and 10 mN/m (curve 3).

## Supporting information SI-2

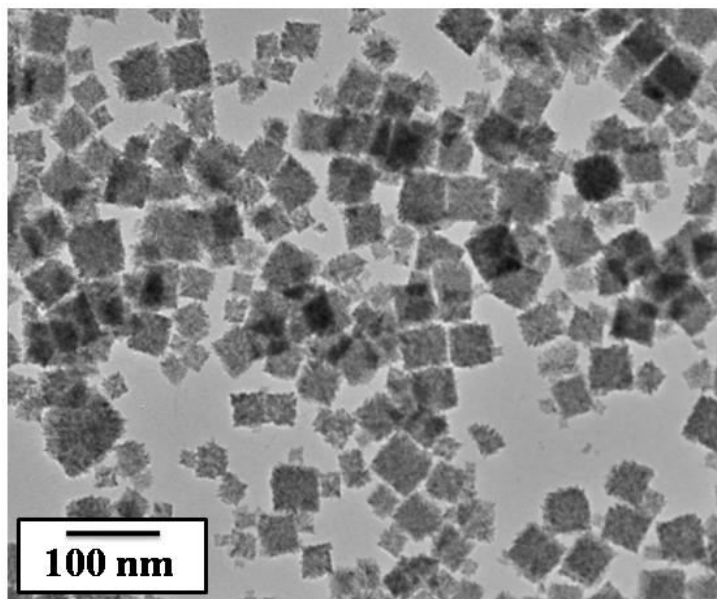

**Figure SI-2.** TEM image of CeO<sub>2</sub> nanocubes obtained by drop casting over carbon-coated Cu grid.

### Supporting information SI-3

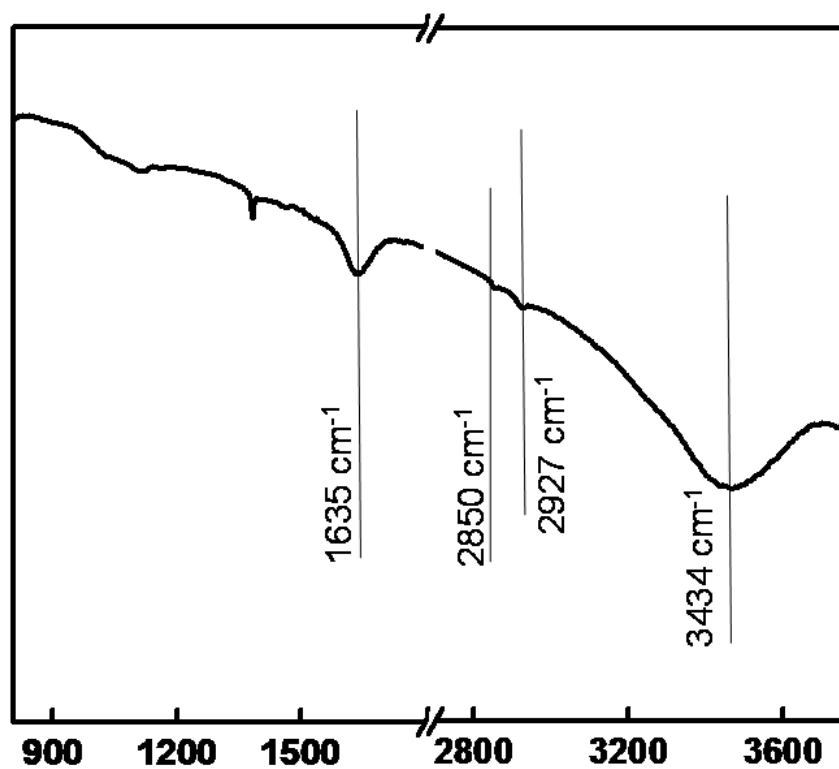

**Figure SI-3.** FTIR from the CeO<sub>2</sub>-Au nanocomposites film deposited from the Langmuir monolayer using LB technique.

#### Supporting information SI-4

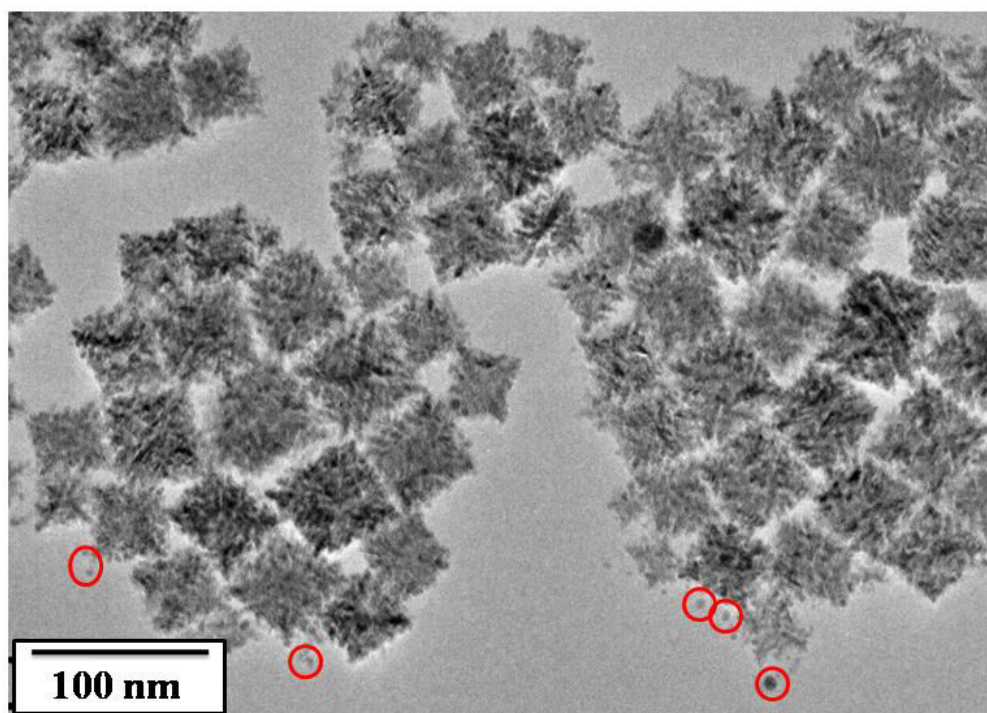

**Figure SI-4.** TEM image of CeO<sub>2</sub>-Au hybrids obtained via LB method. Gold particles outside CeO<sub>2</sub> nanocubes were encircled with red.

### Supporting information SI-5

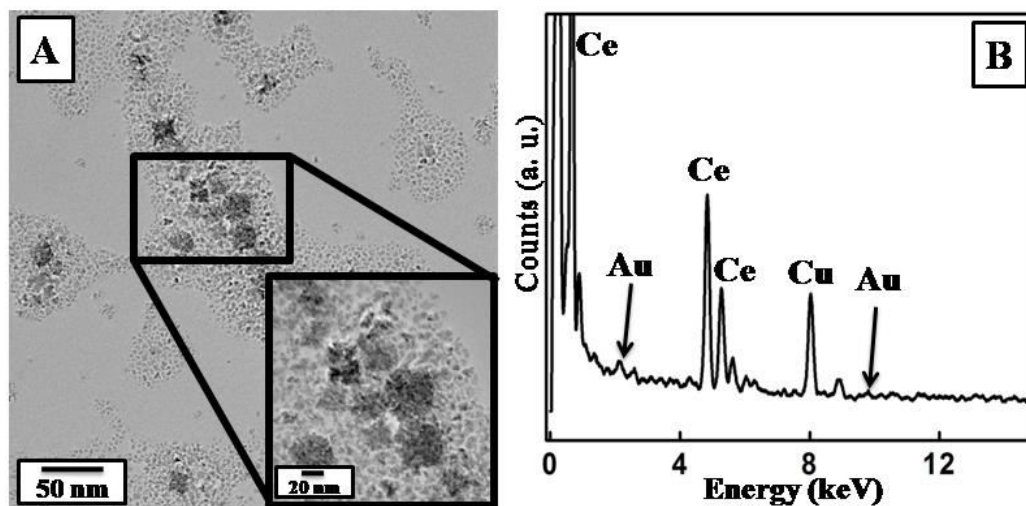

**Figure SI-5.** (A) TEM and (B) EDAX spectrum of CeO<sub>2</sub>-Au hybrids obtained from the beaker based approach. A portion of the Fig. A was shown at higher magnification in the inset of it.
